# Supplementary material
Source: HighWire-hosted journal article supplement (http://qualitysafety.bmj.com/highwire/filestream/161448/field_highwire_adjunct_files/0/bmjqs-2021-014382supp001_data_supplement.pdf)
Supplement: bmjqs-2021-014382supp001_data_supplement.pdf [file bmjqs-2021-014382supp001_data_supplement.pdf]

## Supplementary Material 1: Variables provided by YAS based on electronic call records

| Variable                                                        |
|-----------------------------------------------------------------|
| NHS Number                                                      |
| Age                                                             |
| Gender                                                          |
| Call date and time (used to order multiple calls by individual) |
| NHS 111 pathway used                                            |
| Disposition (Outcome) of Call                                   |

## Supplementary Material 2: Variables provided by NHS digital

| Variable                                                                                      | Source                                                   | Timeframe                                           |
|-----------------------------------------------------------------------------------------------|----------------------------------------------------------|-----------------------------------------------------|
| Date of Birth (single source of truth to calculate age)                                       | Any NHS digital dataset                                  |                                                     |
| Gender                                                                                        | Any NHS digital dataset                                  |                                                     |
| Post code (used to calculate deprivation index)                                               | Any NHS digital dataset                                  |                                                     |
| Ethnicity                                                                                     | Any NHS digital dataset                                  |                                                     |
| Date of death                                                                                 | Office for National Statistics Mortality Data            | Following first contact NHS 111 in study period     |
| Cause of death (ICD10 code)                                                                   | Office for National Statistics Mortality Data            | Following first contact NHS 111 in study period     |
| Date of critical care admission                                                               | Hospital Episode Statistics Critical Care Inpatient Data | Following first contact NHS 111 in study period     |
| Basic or advanced renal, cardiovascular or respiratory support during critical care admission | Hospital Episode Statistics Critical Care Inpatient Data | Following first contact NHS 111 in study period     |
| Date of Inpatient admission                                                                   | Hospital Episode Statistics Admitted Patient Care record | Following first contact NHS 111 in study period     |
| Date of COVID-19 diagnosis (Inpatient)                                                        | Hospital Episode Statistics Admitted Patient Care record | Following first contact NHS 111 in study period     |
| Date of Emergency Department Attendance                                                       | Hospital Episode Statistics Emergency Care record        | Following first contact NHS 111 in study period     |
| Date of COVID-19 diagnosis (Emergency Department)                                             | Hospital Episode Statistics Emergency Care record        | Following first contact NHS 111 in study period     |
| Cardiovascular Comorbidity                                                                    | GPES Data for Pandemic Planning and Research             | 1 year before first contact NHS 111 in study period |
| Respiratory Comorbidity                                                                       | GPES Data for Pandemic Planning and Research             | 1 year before first contact NHS 111 in study period |
| Diabetic Comorbidity                                                                          | GPES Data for Pandemic Planning and Research             | 1 year before first contact NHS 111 in study period |
| GP estimated Frailty                                                                          | GPES Data for Pandemic Planning and Research             | 1 year before first contact NHS 111 in study period |
| Hypertension                                                                                  | GPES Data for Pandemic Planning and Research             | 1 year before first contact NHS 111 in study period |

|                   |                                              |                                                       |
|-------------------|----------------------------------------------|-------------------------------------------------------|
| Immunosuppression | GPES Data for Pandemic Planning and Research | 30 days before first contact NHS 111 in study period  |
| Malignancy        | GPES Data for Pandemic Planning and Research | 1 year before first contact NHS 111 in study period   |
| Obesity           | GPES Data for Pandemic Planning and Research | 1 year before first contact NHS 111 in study period   |
| Pregnancy         | GPES Data for Pandemic Planning and Research | 9 months before first contact NHS 111 in study period |
| Renal Impairment  | GPES Data for Pandemic Planning and Research | 1 year before first contact NHS 111 in study period   |
| Smoking Status    | GPES Data for Pandemic Planning and Research | Last recorded                                         |
| Drug Count        | GPES Data for Pandemic Planning and Research | Last recorded                                         |

## Supplementary Material 3: Classification 111 triage categories

|                                                                                                                                                                                                                                                                                                                                                                                              |                                                                                                                                                                                                                                                                                                                                                                                                    |
|----------------------------------------------------------------------------------------------------------------------------------------------------------------------------------------------------------------------------------------------------------------------------------------------------------------------------------------------------------------------------------------------|----------------------------------------------------------------------------------------------------------------------------------------------------------------------------------------------------------------------------------------------------------------------------------------------------------------------------------------------------------------------------------------------------|
| Ambulance dispatched or other urgent clinical assessment                                                                                                                                                                                                                                                                                                                                     | Self-care or non-urgent assessment                                                                                                                                                                                                                                                                                                                                                                 |
| Ambulance response<br>Speak to a Clinician from our service<br>Immediately<br>COVID risk Clinical Assessment service 1 hour<br>COVID risk Clinical Assessment service 2 hours<br>COVID risk Clinical Assessment service 4 hours<br>Speak to a Primary Care Service within 1 Hour<br>Speak to a Primary Care Service within 2 Hours<br>Advised to make own way for urgent clinical assessment | COVID Self Care<br>COVID Coordination Service<br>COVID risk Clinical Assessment service 6 hours<br>COVID risk Clinical Assessment service 12 hours<br>COVID risk Clinical Assessment Service next working day<br>Home Management<br>The call is closed with no further action needed<br>All Dental Dispositions<br>Any disposition to contact own GP or primary care service<br>Midwife assessment |

## Supplementary Material 4: NHS 111 COVID-19 assessment pathways implementation by Yorkshire Ambulance Service

| NHS 111 Pathway* | Implementation Date | Study Period | Description                                                                                                                                                               |
|------------------|---------------------|--------------|---------------------------------------------------------------------------------------------------------------------------------------------------------------------------|
| 19.3.3           | 16/3/2020           | 1            | First specific COVID-19 pathway, focus on remote consultations or remote follow-up.                                                                                       |
| 19.3.4           | Not implemented     | 1            |                                                                                                                                                                           |
| 19.3.5 & 19.3.6  | 03/04/2020          | 1            | Chest pain incorporated as part of COVID assessment pathway<br>New questions to identify vulnerable Patients                                                              |
| 19.3.7           | 10/04/2020          | 1            | New advice provided for signs of deterioration and what to do in patients advised to self-care.                                                                           |
| 19.3.8           | 02/06/2020          | 2            | More specific triage for symptoms non-specific for COVID e.g. cough or fever offers normal triage plus access to coronavirus triage if certain trigger criteria were met. |
| 19.3.9           | 03/06/2020          | 2            | Incorporates loss of taste or smell as COVID symptom                                                                                                                      |

\*Information regarding specific pathways obtained here <https://digital.nhs.uk/services/nhs-pathways/nhs-pathways-service-information/clinical-release-notes/archived-clinical-release-notes/2020-archived-clinical-release-notes>

## Supplementary Material 5: Multi-variable model predicting primary outcome

| <b>Population Characteristic</b>                     | <b>Level</b>                              | <b>Odds ratio (95% Confidence Interval)<br/>N= 31, 820</b> |
|------------------------------------------------------|-------------------------------------------|------------------------------------------------------------|
| <b>Age (Years)</b>                                   | 1-year increase                           | 1.06 (1.06 to 1.07)                                        |
| <b>Gender (N, %)</b>                                 | Female                                    | 0.48 (0.40 to 0.58)                                        |
| <b>Comorbidity (N, %)</b>                            | Cardiovascular Disease                    | 0.80 (0.51 to 1.26)                                        |
|                                                      | Chronic Resp. Disease                     | 0.96 (0.76 to 1.21)                                        |
|                                                      | Diabetes                                  | 1.62 (1.26 to 2.09)                                        |
|                                                      | Hypertension                              | 1.08 (0.85 to 1.38)                                        |
|                                                      | Immunosuppression (including steroid use) | 0.97 (0.74 to 1.28)                                        |
|                                                      | Active Malignancy                         | 1.32 (0.80 to 2.19)                                        |
|                                                      | Obesity                                   | Not included                                               |
|                                                      | Renal Impairment                          | 1.21 (0.69 to 2.13)                                        |
|                                                      | Smoker                                    | 0.85 (0.69 to 1.04)                                        |
|                                                      | Stroke                                    | 0.54 (0.20 to 1.41)                                        |
| <b>Number of Drugs Used (N, %)</b>                   | 0                                         | Reference                                                  |
|                                                      | 1-5                                       | 1.03 (0.80 to 1.36)                                        |
|                                                      | 6-10                                      | 0.93 (0.63 to 1.39)                                        |
|                                                      | 11 or more                                | 0.87 (0.46 to 1.64)                                        |
| <b>Clinical Frailty Scale (N, %)</b>                 | 1-3                                       | Reference                                                  |
|                                                      | 4-6                                       | 1.07 (0.71 to 1.61)                                        |
|                                                      | 7-9                                       | 2.51 (1.74 to 3.61)                                        |
| <b>Deprivation Index (N, %)</b>                      | 1-2                                       | Reference                                                  |
|                                                      | 3-4                                       | 1.04 (0.80 to 1.34)                                        |
|                                                      | 5-6                                       | 1.02 (0.77 to 1.34)                                        |
|                                                      | 7-8                                       | 1.11 (0.85 to 1.45)                                        |
|                                                      | 9-10                                      | 1.09 (0.81 to 1.46)                                        |
| <b>Number of 111 contacts in study period (N, %)</b> | 1                                         | Reference                                                  |
|                                                      | 2                                         | 1.69 (1.27 to 2.27)                                        |
|                                                      | 3 or more                                 | 2.73 (1.70 to 4.39)                                        |

Supplementary Material 6: Performance of binary NHS 111 triage (ambulance or urgent assessment 4 hours or less) for composite outcome (death or organ support)

| <b>Composite Adverse outcome 7 days (1.7%, 1.6-1.8%)</b> |                        |                           |                                                                                   |
|----------------------------------------------------------|------------------------|---------------------------|-----------------------------------------------------------------------------------|
| N=40, 261                                                | <b>Adverse Outcome</b> | <b>No Adverse Outcome</b> |                                                                                   |
| Ambulance/urgent assessment                              | 500                    | 15,430                    | Sensitivity 74.4% (70.9-77.6%)<br>Positive Predictive Value 3.1% (2.9 – 3.4%)     |
| Self-care/ non-urgent assessment                         | 170                    | 24,160                    | Specificity 61% (60.5% - 61.5%)<br>Negative Predictive Value 99.3% (99.2 - 99.4%) |

| <b>Composite Adverse outcome 72 hours (0.8%, 0.7-0.9%)</b> |                        |                           |                                                                                     |
|------------------------------------------------------------|------------------------|---------------------------|-------------------------------------------------------------------------------------|
| N=40, 261                                                  | <b>Adverse Outcome</b> | <b>No Adverse Outcome</b> |                                                                                     |
| Ambulance/urgent assessment                                | 260                    | 15,670                    | Sensitivity 81.4% (76.6-85.5%)<br>Positive Predictive Value 1.6% (1.4 – 1.8%)       |
| Self-care/ non-urgent assessment                           | 60                     | 24,275                    | Specificity 60.8% (60.3% - 61.3%)<br>Negative Predictive Value 99.8% (99.7 - 99.9%) |

## Supplementary 7: Comparison of False Negatives and True positives

| Population Characteristic     | Level                       | False Negatives (30 days) N= 310 | True Positives (30 days) N=890 |
|-------------------------------|-----------------------------|----------------------------------|--------------------------------|
| Age (Years)                   | Median (IQR)*               | 71.5 (57-84)                     | 78 (66-86)                     |
|                               | Mean                        | 69.9                             | 74.5                           |
| Gender (N, %)                 | Male                        | 185<br>(59%)                     | 525<br>(58.9%)                 |
| Comorbidity (N, %)            | Cardiovascular Disease      | **                               | 70<br>(8%)                     |
|                               | Chronic Respiratory Disease | 70<br>(22.9%)                    | 250<br>(28.1%)                 |
|                               | Diabetes                    | 80<br>(24.8%)                    | 200<br>(22.1%)                 |
|                               | Hypertension                | 115<br>(36.7%)                   | 400<br>(44.7%)                 |
|                               | Immunosuppression           | 30<br>(8.7%)                     | 160<br>(18.1%)                 |
|                               | Active Malignancy           | **                               | 50<br>(5.5%)                   |
|                               | Obesity                     | 40<br>(12.3%)                    | 70<br>(7.6%)                   |
|                               | Pregnant                    | **                               | **                             |
|                               | Renal Impairment            | **                               | 35<br>(4%)                     |
|                               | Smoker                      | 95<br>(31%)                      | 335<br>(37.6%)                 |
|                               | Stroke                      | **                               | 15<br>1.7% (1-2.8%)            |
| Number of Drugs Used (N, %)   | 0                           | 75 (23.6%)                       | 160 (17.6%)                    |
|                               | 1-5                         | 175 (56.5%)                      | 445 (49.7%)                    |
|                               | 6-10                        | 55 (18.1%)                       | 260 (29%)                      |
|                               | 11 or more                  | 5 (1.9%)                         | 33 (3.7%)                      |
| Clinical Frailty Scale (N, %) | Unknown                     | 130 (42.6%)                      | 470 (53%)                      |
|                               | Aged<65                     | 120 (39.4%)                      | 210 (23.2%)                    |
|                               | 1-3                         | **                               | 10 (1%)                        |
|                               | 4-6                         | **                               | 45 (4.9%)                      |
|                               | 7-9                         | 40 (11.9%)                       | 160 (17.9%)                    |
| Ethnicity (N, %)              | Unknown                     | 100 (31.3%)                      | 310 (34.9%)                    |
|                               | Asian or Asian British      | 30 (10%)                         | 10 (1%)                        |
|                               | Black or Black British      | **                               | **                             |
|                               | Mixed                       | **                               | 10 (1%)                        |
|                               | Other Ethnic Groups         | **                               | 60 (6.4%)                      |
|                               | White                       | 170 (55.2%)                      | 500 (55.9%)                    |
| Deprivation Index (N, %)      | Unknown                     | 30 (10%)                         | 105 (11.7%)                    |
|                               | 1-2                         | 85 (27%)                         | 250 (28%)                      |
|                               | 3-4                         | 55 (18.1%)                       | 150 (16.7%)                    |

|                                                          |                                               |             |             |
|----------------------------------------------------------|-----------------------------------------------|-------------|-------------|
|                                                          | 5-6                                           | 40 (13.6%)  | 140 (15.5%) |
|                                                          | 7-8                                           | 50 (16.8%)  | 140 (15.8%) |
|                                                          | 9-10                                          | 45 (14.8%)  | 110 (12.4%) |
| <b>Index Triage Category (N, %)</b>                      | Self-care                                     | 85 (27.7%)  | NA          |
|                                                          | Ambulance Response                            | NA          | 450 (50.6%) |
|                                                          | Further COVID Assessment                      | 215 (68.7%) | 295 (44.1%) |
|                                                          | Further GP Assessment                         | 10 (3.2%)   | 45 (5.1%)   |
| <b>Outcome (N, %)</b>                                    | Death                                         | 210 (67.1%) | 700 (78.6%) |
|                                                          | Deaths due to COVID (including after 30 days) | 140 (45.8%) | 435 (48.8%) |
|                                                          | Organ support (within 30 days)                | 140 (45.2%) | 225 (45.2%) |
| <b>Hospitalisation (N, %)</b>                            | Emergency Department (ED) Attendance          | 210 (68.4%) | 630 (70.6%) |
|                                                          | Inpatient admission                           | 215 (69%)   | 625 (70.3%) |
| <b>Diagnosis of COVID</b>                                | In ED or as inpatient at 30 days              | 170 (55.5%) | 475 (53.4%) |
| <b>Number of NHS 111 contacts in study period (N, %)</b> | 1                                             | 250 (81.3%) | 810 (90.6%) |
|                                                          | 2                                             | 44 (14.2%)  | 75 (8.2%)   |
|                                                          | 3 or more                                     | 15 (5%)     | 10 (1.2%)   |
| <b>Time to Primary Outcome (N, %)</b>                    | 72 hours                                      | 60 (19%)    | 260 (29.1%) |
|                                                          | 7 days                                        | 170 (55.5%) | 500 (56.1%) |

\*Interquartile Range (IQR)

\*\*Numbers suppressed due to small numbers

Supplementary Material 8: Comparison of False Positives and True Negatives

| Population Characteristic     | Level                       | False Positives (30 days)<br>N= 10, 000 | True Negative (30 days)<br>N=24, 025 |
|-------------------------------|-----------------------------|-----------------------------------------|--------------------------------------|
| Age (Years)                   | Median (IQR)*               | 49 (33-65)                              | 44 (31-57)                           |
|                               | Mean                        | 49.9                                    | 45.2                                 |
| Gender (N, %)                 | Male                        | 4,190<br>(41.9%)                        | 10,460<br>(43.5%)                    |
| Comorbidity (N, %)            | Cardiovascular Disease      | 235<br>(2.4%)                           | 310<br>(1.3%)                        |
|                               | Chronic Respiratory Disease | 3,160<br>(31.6%)                        | 5,125<br>(21.3%)                     |
|                               | Diabetes                    | 1,120<br>(11.2%)                        | 2,100<br>(8.7%)                      |
|                               | Hypertension                | 2,010<br>(20.1%)                        | 3,320<br>(13.8%)                     |
|                               | Immunosuppression           | 1070<br>(10.7%)                         | 1, 278<br>(5.3%)                     |
|                               | Active Malignancy           | 120<br>(1.2%)                           | 150<br>(0.6%)                        |
|                               | Obesity                     | 1,660<br>(16.6%)                        | 3,490<br>(14.5%)                     |
|                               | Pregnant                    | 190<br>(1.9%)                           | 470<br>(2%)                          |
|                               | Renal Impairment            | 135<br>(1.4%)                           | 140<br>(0.6%)                        |
|                               | Smoker                      | 3, 245<br>(32.4%)                       | 6, 200<br>(25.8%)                    |
|                               | Stroke                      | 70<br>(0.7%)                            | 85<br>(0.35%)                        |
| Number of Drugs Used (N, %)   | 0                           | 3, 900 (39%)                            | 12, 230 (50.9%)                      |
|                               | 1-5                         | 4, 500 (45%)                            | 9, 830 (40.9%)                       |
|                               | 6-10                        | 1, 420 (14.2%)                          | 1, 800 (7.5%)                        |
|                               | 11 or more                  | 190 (1.9%)                              | 165 (0.7%)                           |
| Clinical Frailty Scale (N, %) | Unknown                     | 1,965 (19.6%)                           | 2,790 (11.6%)                        |
|                               | Aged<65                     | 7,470 (74.7%)                           | 20,725 (86.3%)                       |
|                               | 1-3                         | 60 (0.6%)                               | 85 (0.4%)                            |
|                               | 4-6                         | 225 (2.2%)                              | 220 (0.9%)                           |
|                               | 7-9                         | 290 (2.9%)                              | 210 (0.9%)                           |
| Ethnicity (N, %)              | Unknown                     | 2,100 (21%)                             | 5,480 (22.8%)                        |
|                               | Asian or Asian British      | 1,025 (10.3%)                           | 2,790 (11.6%)                        |
|                               | Black or Black British      | 190 (1.9%)                              | 555 (2.3%)                           |
|                               | Mixed                       | 110 (1%)                                | 355 (1.5%)                           |
|                               | Other Ethnic Groups         | 130 (1.3%)                              | 420 (1.7%)                           |
|                               | White                       | 6,445 (64%)                             | 14,420 (60%)                         |
| Deprivation Index (N, %)      | Unknown                     | 650 (6.5%)                              | 1, 180 (4.9%)                        |
|                               | 1-2                         | 3, 570 (38.2%)                          | 8, 730 (38.2%)                       |
|                               | 3-4                         | 1, 770 (19%)                            | 4, 500 (19.7%)                       |
|                               | 5-6                         | 1, 470 (15.7%)                          | 3, 665 (16%)                         |
|                               | 7-8                         | 1, 435 (15.4%)                          | 3, 440 (15.1%)                       |
|                               | 9-10                        | 1, 105 (11.8%)                          | 2, 510 (11%)                         |



|                                                          |                          |                |                 |
|----------------------------------------------------------|--------------------------|----------------|-----------------|
| <b>Index Triage Category (N, %)</b>                      | Self-care                | NA             | 12, 840 (53.4%) |
|                                                          | Ambulance Response       | 1, 645 (16.5%) | NA              |
|                                                          | Further COVID Assessment | 7, 935 (79.3%) | 10, 300 (42.9%) |
|                                                          | Further GP Assessment    | 360 (3.6%)     | 490 (2%)        |
| <b>Number of NHS 111 contacts in study period (N, %)</b> | 1                        | 9,230 (92.3%)  | 21,855 (91%)    |
|                                                          | 2                        | 645 (6.5%)     | 1,740 (7.3%)    |
|                                                          | 3 or more                | 130 (1.3%)     | 430 (1.8%)      |

\*Interquartile Range (IQR)
